# Supplementary material for: Distinct Short-Term Response of Intracellular Amino Acids in Saccharomyces cerevisiae and Pichia pastoris to Oxidative and Reductive Stress
Source: MDPI journal article supplement (doi:10.3390/fermentation10030166), 2024-03-15
Supplement: s1 [file s1]

# Distinct Short-Term Response of Intracellular Amino Acids in *Saccharomyces cerevisiae* and *Pichia pastoris* to Oxidative and Reductive Stress

**Table S1.** Vitamin solution and Trace elements for Verduyn Medium [13]

| 1000X Vitamin solution for Verduyn medium           |                  |
|-----------------------------------------------------|------------------|
| Components                                          | Composition(g/L) |
| D-biotin                                            | 0.05             |
| Ca-D-pantothenate                                   | 1                |
| Nicotinic acid                                      | 1                |
| Myo-inositol                                        | 25               |
| Thiamine hydrochloride                              | 1                |
| Pyridoxal hydrochloride                             | 1                |
| p-aminobenzoic acid                                 | 0.2              |
| 100X Trace Elements for Verduyn medium              |                  |
| Components                                          | Composition(g/L) |
| Na <sub>2</sub> EDTA                                | 1.5              |
| ZnSO <sub>4</sub> .7H <sub>2</sub> O                | 0.45             |
| MnCl <sub>2</sub> .2H <sub>2</sub> O                | 0.1              |
| CoCl <sub>2</sub> .6H <sub>2</sub> O                | 0.03             |
| CuSO <sub>4</sub> .5H <sub>2</sub> O                | 0.03             |
| Na <sub>2</sub> MoO <sub>4</sub> .2H <sub>2</sub> O | 0.04             |
| CaCl <sub>2</sub> .2H <sub>2</sub> O                | 0.45             |
| FeSO <sub>4</sub> .7H <sub>2</sub> O                | 0.3              |
| H <sub>3</sub> BO <sub>3</sub>                      | 0.1              |
| KI                                                  | 0.01             |

**Table S2.** The amino acid standards used as an external calibration for HPLC

| <b>Amino acid standards</b> | <b>Abbreviations</b> | <b>R<sup>2</sup></b> | <b>Slope</b> | <b>Intercept</b> | <b>Range (g/L)</b> |
|-----------------------------|----------------------|----------------------|--------------|------------------|--------------------|
| Tryptophan                  | TRP                  | 0.999                | 1.86E-08     | -0.004           | 0.01-1             |
| Phenylalanine               | PHE                  | 0.997                | 1.93E-08     | -0.012           | 0.01-1             |
| Alanine                     | ALA                  | 0.984                | 1.11E-08     | -0.253           | 0.1-2              |
| Valine                      | VAL                  | 1.000                | 1.18E-08     | -0.008           | 0.01-1             |
| Isoleucine                  | ILE                  | 1.000                | 2.15E-08     | -0.016           | 0.01-0.5           |
| Leucine                     | LEU                  | 0.999                | 1.93E-08     | -0.041           | 0.01-1             |
| Glycine                     | GLY                  | 0.970                | 9.47E-09     | 0.123            | 0.05-2             |
| Cysteine                    | CYS                  | 0.914                | 1.97E-07     | -0.265           | 0.1-1              |
| Glutamate                   | GLU                  | 1.000                | 1.95E-08     | 0.008            | 0.01-1             |
| Serine                      | SER                  | 1.000                | 1.03E-08     | 0.007            | 0.01-1             |
| Aspartate                   | ASP                  | 0.996                | 2.73E-08     | -0.013           | 0.005-1            |
| Proline                     | PRO                  | 0.988                | 2.16E-07     | -0.157           | 0.1-1              |
| Arginine                    | ARG                  | 0.984                | 4.22E-08     | -0.660           | 0.1-5              |
| Methionine                  | MET                  | 0.854                | 3.31E-07     | -0.104           | 0.5-0.01           |
| Asparagine                  | ASN                  | 0.999                | 1.24E-07     | -0.008           | 0.01-1             |
| Glutamine                   | GLN                  | 0.883                | 4.64E-08     | -0.800           | 0.1-4              |
| Lysine                      | LYS                  | 0.990                | 1.17E-08     | -0.045           | 0.01-1             |

**Table S3.** The effect of 5 mM H<sub>2</sub>O<sub>2</sub>-induced oxidative stress as well as 20 mM DTT-induced reductive stress on intracellular amino acid levels is presented in  $\mu\text{mol/gDW}$  for *S.cerevisiae*

| <i>S.cerevisiae</i> CEN.PK113-7D         |                     |                     |                     |                     |
|------------------------------------------|---------------------|---------------------|---------------------|---------------------|
| 5 mM H <sub>2</sub> O <sub>2</sub>       |                     |                     |                     |                     |
| Concentration( $\mu\text{mol/gDW}$ cell) |                     |                     |                     |                     |
|                                          | 0 min               | 1 min               | 3 min               | 5 min               |
| ALA                                      | 25.54 $\pm$ 10.36   | 25.85 $\pm$ 3.72    | 31.95 $\pm$ 16.44   | 27.71 $\pm$ 16.47   |
| ARG                                      | 84.95 $\pm$ 34.81   | 81.74 $\pm$ 68.57   | 107.22 $\pm$ 47.03  | 107.86 $\pm$ 66.01  |
| ASN                                      | 13.55 $\pm$ 4.84    | 15.97 $\pm$ 5.11    | 15.52 $\pm$ 7.41    | 13.99 $\pm$ 4.71    |
| ASP                                      | 51.82 $\pm$ 10.38   | 53.29 $\pm$ 9.18    | 55.06 $\pm$ 17.98   | 54.34 $\pm$ 25.39   |
| CYS                                      | 45.28 $\pm$ 56.61   | 64.24 $\pm$ 51.44   | 73.45 $\pm$ 42.69   | 85.94 $\pm$ 37.95   |
| GLU                                      | 320.10 $\pm$ 114.74 | 290.64 $\pm$ 127.94 | 317.12 $\pm$ 177.14 | 338.18 $\pm$ 178.62 |
| GLY                                      | 32.89 $\pm$ 2.55    | 46.08 $\pm$ 25.34   | 32.51 $\pm$ 8.84    | 35.06 $\pm$ 5.32    |
| MET                                      | 174.90 $\pm$ 9.58   | 118.24 $\pm$ 95.84  | 134.28 $\pm$ 117.65 | 200.32 $\pm$ 30.67  |
| PHE                                      | 2.68 $\pm$ 0.42     | 1.69 $\pm$ 0.15     | 2.84 $\pm$ 1.14     | 3.32 $\pm$ 1.54     |
| SER                                      | 4.44 $\pm$ 0.40     | 3.86 $\pm$ 0.53     | 4.66 $\pm$ 0.40     | 4.56 $\pm$ 0.62     |
| TRP                                      | 1.14 $\pm$ 0.11     | 1.97 $\pm$ 2.23     | 1.26 $\pm$ 1.30     | 1.09 $\pm$ 0.22     |
| VAL                                      | 8.53 $\pm$ 3.09     | 7.25 $\pm$ 4.04     | 8.31 $\pm$ 6.85     | 8.96 $\pm$ 5.96     |
| ILE+LEU                                  | 19.34 $\pm$ 4.49    | 13.52 $\pm$ 1.49    | 15.38 $\pm$ 4.82    | 17.37 $\pm$ 0.21    |
| LYS                                      | 11.62 $\pm$ 4.52    | 11.78 $\pm$ 8.23    | 19.78 $\pm$ 2.00    | 14.47 $\pm$ 9.60    |
| GLN                                      | 187.46 $\pm$ 82.18  | 174.57 $\pm$ 123.80 | 248.46 $\pm$ 98.17  | 231.16 $\pm$ 176.41 |
| PRO                                      | 194.98 $\pm$ 70.21  | 144.04 $\pm$ 3.54   | 161.57 $\pm$ 0.39   | 162.47 $\pm$ 4.29   |
| 20 mM DTT                                |                     |                     |                     |                     |
| Concentration( $\mu\text{mol/gDW}$ cell) |                     |                     |                     |                     |
|                                          | 0 min               | 1 min               | 3 min               | 5 min               |
| ALA                                      | 23.53 $\pm$ 2.06    | 18.89 $\pm$ 14.84   | 17.15               | 13.10 $\pm$ 5.02    |
| ARG                                      | 110.81 $\pm$ 16.44  | 118.43 $\pm$ 9.94   | 108.19              | 108.10 $\pm$ 11.07  |
| ASN                                      | 17.67 $\pm$ 7.97    | 11.70 $\pm$ 3.09    | 10.47               | 9.10 $\pm$ 1.75     |
| ASP                                      | 37.87 $\pm$ 2.88    | 30.38 $\pm$ 11.01   | 29.74               | 23.98 $\pm$ 5.23    |
| CYS                                      | 98.62 $\pm$ 3.20    | 91.96 $\pm$ 20.87   | 91.35               | 79.25 $\pm$ 13.55   |
| GLU                                      | 377.07 $\pm$ 39.13  | 325.46 $\pm$ 157.54 | 358.57              | 317.43 $\pm$ 85.46  |
| GLY                                      | 36.46 $\pm$ 0.76    | 36.48 $\pm$ 4.63    | 34.51               | 32.05 $\pm$ 5.21    |
| MET                                      | 236.20 $\pm$ 67.58  | 416.91 $\pm$ 54.19  | 308.25              | 400.22 $\pm$ 23.46  |
| PHE                                      | 2.40 $\pm$ 0.62     | 2.24 $\pm$ 0.51     | 2.02                | 2.61 $\pm$ 0.11     |
| SER                                      | 4.14 $\pm$ 0.15     | 3.73 $\pm$ 0.69     | 3.74                | 3.54 $\pm$ 0.88     |
| TRP                                      | 4.19 $\pm$ 1.39     | 4.59 $\pm$ 1.73     | 4.08                | 5.19 $\pm$ 0.57     |
| VAL                                      | 8.89 $\pm$ 0.76     | 6.79 $\pm$ 4.36     | 6.69                | 6.19 $\pm$ 0.93     |
| ILE+LEU                                  | 14.66 $\pm$ 1.42    | 12.63 $\pm$ 0.49    | 8.22                | 9.80 $\pm$ 0.02     |
| LYS                                      | 7.14 $\pm$ 0.64     | 6.53 $\pm$ 1.02     | 7.44                | 6.87 $\pm$ 1.67     |
| GLN                                      | 304.92 $\pm$ 0.39   | 263.39 $\pm$ 164.39 | 288.90              | 247.14 $\pm$ 53.58  |
| PRO                                      | 152.56 $\pm$ 15.34  | 273.41 $\pm$ 14.14  | 141.48              | 201.42 $\pm$ 58.99  |

**Table S4.** The effect of 5 mM H<sub>2</sub>O<sub>2</sub>-induced oxidative stress as well as 20 mM DTT-induced reductive stress on intracellular amino acid levels is presented in  $\mu\text{mol/gDW}$  *P.pastoris*

| <i>P.pastoris</i> ATCC28485              |                     |                     |                     |                     |
|------------------------------------------|---------------------|---------------------|---------------------|---------------------|
| 5 mM H <sub>2</sub> O <sub>2</sub>       |                     |                     |                     |                     |
| Concentration( $\mu\text{mol/gDW}$ cell) |                     |                     |                     |                     |
|                                          | 0 min               | 1 min               | 3 min               | 5 min               |
| ALA                                      | 16.54 $\pm$ 1.90    | 19.08 $\pm$ 5.14    | 16.40 $\pm$ 0.28    | 15.41 $\pm$ 1.33    |
| ARG                                      | 127.18 $\pm$ 35.89  | 137.92 $\pm$ 30.18  | 150.52 $\pm$ 9.71   | 129.01 $\pm$ 20.33  |
| ASN                                      | 14.27 $\pm$ 3.28    | 13.00 $\pm$ 1.45    | 10.84 $\pm$ 3.07    | 16.06 $\pm$ 6.22    |
| ASP                                      | 35.96 $\pm$ 0.27    | 51.40 $\pm$ 14.84   | 63.64 $\pm$ 8.60    | 53.05 $\pm$ 5.38    |
| CYS                                      | 55.90 $\pm$ 15.75   | 72.69 $\pm$ 10.79   | 65.54 $\pm$ 10.85   | 56.38 $\pm$ 7.70    |
| GLU                                      | 291.22 $\pm$ 41.68  | 207.11 $\pm$ 125.39 | 242.24 $\pm$ 102.42 | 240.75 $\pm$ 57.00  |
| GLY                                      | 27.75 $\pm$ 0.58    | 28.14 $\pm$ 0.64    | 25.39 $\pm$ 4.33    | 27.47 $\pm$ 0.66    |
| MET                                      | 47.28 $\pm$ 24.75   | 62.47 $\pm$ 30.99   | 45.46 $\pm$ 20.63   | 50.17 $\pm$ 27.57   |
| PHE                                      | 0.71 $\pm$ 0.39     | 1.04 $\pm$ 0.06     | 0.55 $\pm$ 0.17     | 0.55 $\pm$ 0.17     |
| SER                                      | 3.56 $\pm$ 0.08     | 3.64 $\pm$ 0.01     | 3.21 $\pm$ 0.50     | 4.16 $\pm$ 0.02     |
| TRP                                      | 2.10 $\pm$ 0.08     | 1.29 $\pm$ 0.25     | 1.33 $\pm$ 0.62     | 1.68 $\pm$ 0.26     |
| VAL                                      | 3.23 $\pm$ 0.17     | 3.28 $\pm$ 0.19     | 3.27 $\pm$ 0.34     | 2.99 $\pm$ 0.59     |
| ILE+LEU                                  | 5.16 $\pm$ 2.89     | 5.80 $\pm$ 0.25     | 4.29 $\pm$ 1.05     | 4.38 $\pm$ 0.99     |
| LYS                                      | 7.31 $\pm$ 1.45     | 9.35 $\pm$ 1.81     | 9.37 $\pm$ 0.51     | 7.62 $\pm$ 0.21     |
| GLN                                      | 329.94 $\pm$ 93.13  | 364.41 $\pm$ 79.06  | 368.06 $\pm$ 13.09  | 312.15 $\pm$ 15.03  |
| PRO                                      | 135.20 $\pm$ 28.15  | 71.42 $\pm$ 31.91   | 85.35 $\pm$ 91.51   | 105.40 $\pm$ 62.77  |
| 20 mM DTT                                |                     |                     |                     |                     |
| Concentration( $\mu\text{mol/gDW}$ cell) |                     |                     |                     |                     |
|                                          | 0 min               | 1 min               | 3 min               | 5 min               |
| ALA                                      | 20.09 $\pm$ 4.79    | 14.32 $\pm$ 4.93    | 11.49 $\pm$ 7.84    | 18.04 $\pm$ 1.38    |
| ARG                                      | 220.64 $\pm$ 19.29  | 174.46 $\pm$ 26.68  | 148.92 $\pm$ 72.26  | 206.86 $\pm$ 25.56  |
| ASN                                      | 11.60 $\pm$ 0.86    | 10.70 $\pm$ 2.25    | 10.54 $\pm$ 0.11    | 12.46 $\pm$ 0.85    |
| ASP                                      | 42.27 $\pm$ 16.28   | 33.71 $\pm$ 6.54    | 26.87 $\pm$ 14.78   | 47.90 $\pm$ 2.68    |
| CYS                                      | 48.61 $\pm$ 16.56   | 36.60 $\pm$ 4.51    | 28.32 $\pm$ 13.95   | 45.36 $\pm$ 9.63    |
| GLU                                      | 260.22 $\pm$ 42.36  | 191.69 $\pm$ 70.26  | 162.02 $\pm$ 116.34 | 243.25 $\pm$ 24.40  |
| GLY                                      | 31.45 $\pm$ 2.12    | 27.77 $\pm$ 5.23    | 29.11 $\pm$ 0.99    | 29.56 $\pm$ 2.03    |
| MET                                      | 85.30 $\pm$ 13.62   | 80.23 $\pm$ 18.59   | 73.88 $\pm$ 24.27   | 98.91 $\pm$ 21.98   |
| PHE                                      | 0.80 $\pm$ 0.25     | 0.82 $\pm$ 0.58     | 0.43 $\pm$ 0.11     | 0.55 $\pm$ 0.03     |
| SER                                      | 5.11 $\pm$ 1.65     | 4.55 $\pm$ 1.95     | 5.31 $\pm$ 1.17     | 4.57 $\pm$ 0.66     |
| TRP                                      | 3.03 $\pm$ 2.24     | 1.54 $\pm$ 0.23     | 1.31 $\pm$ 1.02     | 1.44 $\pm$ 0.36     |
| VAL                                      | 4.32 $\pm$ 0.26     | 2.42 $\pm$ 1.20     | 2.11 $\pm$ 1.77     | 3.07 $\pm$ 0.53     |
| ILE+LEU                                  | 7.03 $\pm$ 0.96     | 4.02 $\pm$ 0.49     | 3.45 $\pm$ 1.67     | 4.00 $\pm$ 0.53     |
| LYS                                      | 13.31 $\pm$ 2.42    | 8.39 $\pm$ 6.30     | 7.42 $\pm$ 7.75     | 13.02 $\pm$ 1.60    |
| GLN                                      | 395.40 $\pm$ 69.40  | 366.13 $\pm$ 16.85  | 292.31 $\pm$ 78.45  | 383.41 $\pm$ 100.14 |
| PRO                                      | 260.38 $\pm$ 260.01 | 232.71 $\pm$ 196.17 | 187.42 $\pm$ 57.79  | 114.56 $\pm$ 37.46  |
